# Supplementary material for: High and fast: NMR protein–proton side-chain assignments at 160 kHz and 1.2 GHz
Source: Royal Society of Chemistry journal article supplement (doi:10.1039/d3sc03539e), 2023-01-01
Supplement: d3sc03539e1.pdf [file d3sc03539e1.pdf]

## Supplementary information for

### High and fast: NMR protein-proton side-chain assignments at 160 kHz and 1.2 GHz

Morgane Callon<sup>#,1,\*</sup>, Dominique Luder<sup>1</sup>, Alexander A. Malär<sup>#,1,a,†</sup>, Thomas Wiegand<sup>1,b,c,†</sup>, Vaclav Rimal<sup>1</sup>, Lauriane Lecoq<sup>5</sup>, Anja Böckmann<sup>5</sup>, Ago Samoson<sup>6</sup> and Beat H. Meier<sup>1\*</sup>

<sup>1</sup> Physical Chemistry, ETH Zürich, 8093 Zürich, Switzerland

<sup>2</sup> Molecular Microbiology and Structural Biochemistry (MMSB) UMR 5086 CNRS/Université de Lyon, Labex Ecofect, 7 passage du Vercors, 69367 Lyon, France

<sup>6</sup> Institute of Cybernetics, Spin Design Laboratory, Tallinn University of Technology, Tallinn, Estonia

<sup>a</sup> Present address: Fraunhofer Headquarters, Hansastr. 27c, 80686 Munich, Germany

<sup>b</sup> Present address: Institute of Technical and Macromolecular Chemistry, RWTH Aachen University, Worringerweg 2, 52074 Aachen, Germany

<sup>c</sup> Present address: Max-Planck-Institute for Chemical Energy Conversion, Stiftstr. 34-36, 45470 Mülheim an der Ruhr, Germany

<sup>#</sup> These authors contributed equally

\*Corresponding authors: MC ([morgane.callon@phys.chem.ethz.ch](mailto:morgane.callon@phys.chem.ethz.ch)) and BHM ([beme@ethz.ch](mailto:beme@ethz.ch))

## Supplementary figures

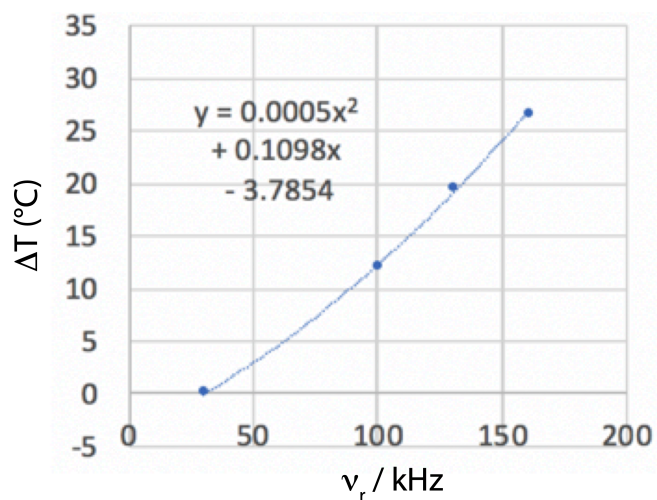

**FIGURE S1** Increase in sample temperature ( $\Delta T$ ) as a function of the MAS frequency ( $\nu_r$ ), for a sample in a 0.5 mm rotor, in a range of MAS frequency from 30 to 160 kHz, measured on lead Nitride.

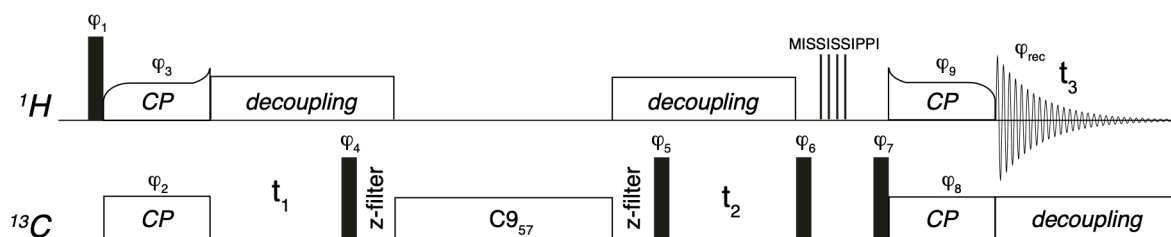

**FIGURE S2** Pulse sequence scheme for the 3D-hCCH TOBSY experiment. Black narrow boxes represent  $\pi/2$  pulses. The hard pulse durations were 1.667 and 2.5  $\mu\text{s}$  for  $^1\text{H}$  and  $^{13}\text{C}$  respectively. Cross-polarisation (CP) transfers details are summarized in Table S4. The z-filter was set to 10 ms. Pulse phases are:  $\varphi_1 = 2(y), 2(-y)$ ;  $\varphi_2 = x, -x$ ;  $\varphi_3 = x$ ;  $\varphi_4 = y$ ;  $\varphi_5 = x$ ;  $\varphi_6 = -x$ ;  $\varphi_7 = y$ ;  $\varphi_8 = x$ ;  $\varphi_9 = x$ ;  $\varphi_{rec} = x, -x, -x, x$ . Quadrature detection was done using States-TPPI<sup>56</sup> by incrementing  $\varphi_5$ .

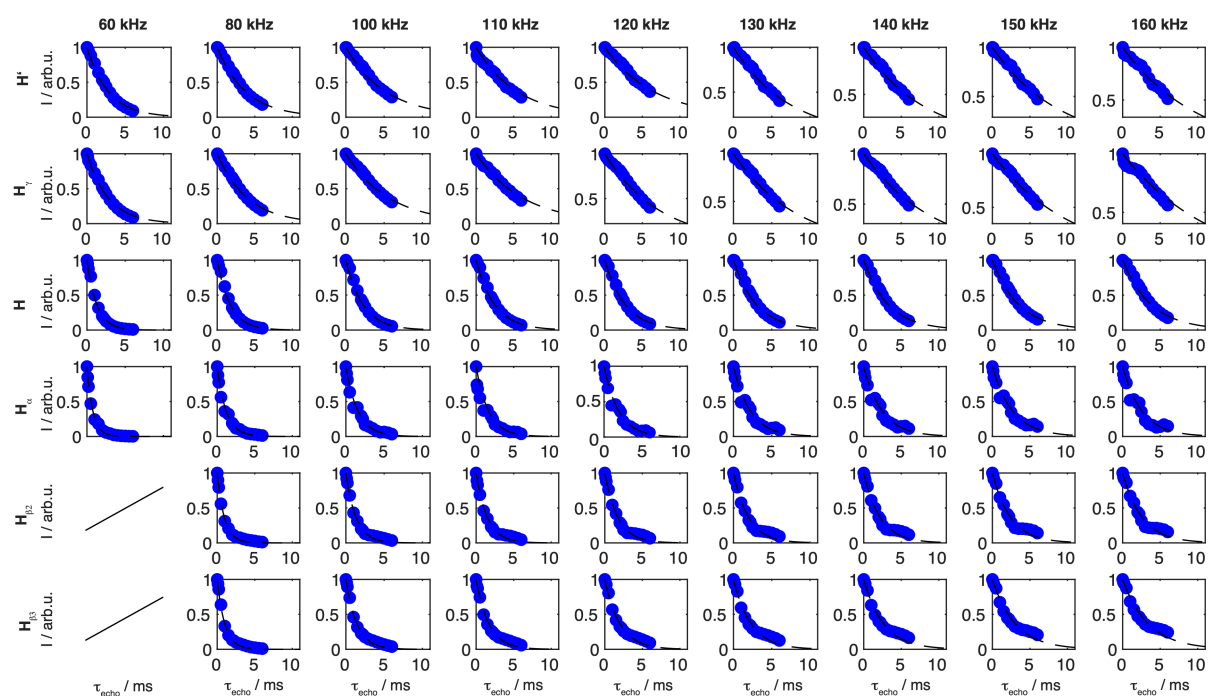

**FIGURE S3** Relaxation decay traces for  $T_2^*(^1H)$  determination of *O*-phospho-L-serine, using Hahn-Echo experiments recorded in an 0.5 mm rotor between 60 and 160 kHz MAS at 850 MHz proton frequency. The corresponding mono-exponential fits are given as black lines. At 60 kHz, the two protons of the  $CH_2$  groups are not enough resolved to be able to measure their relaxations individually (see Fig. 2).

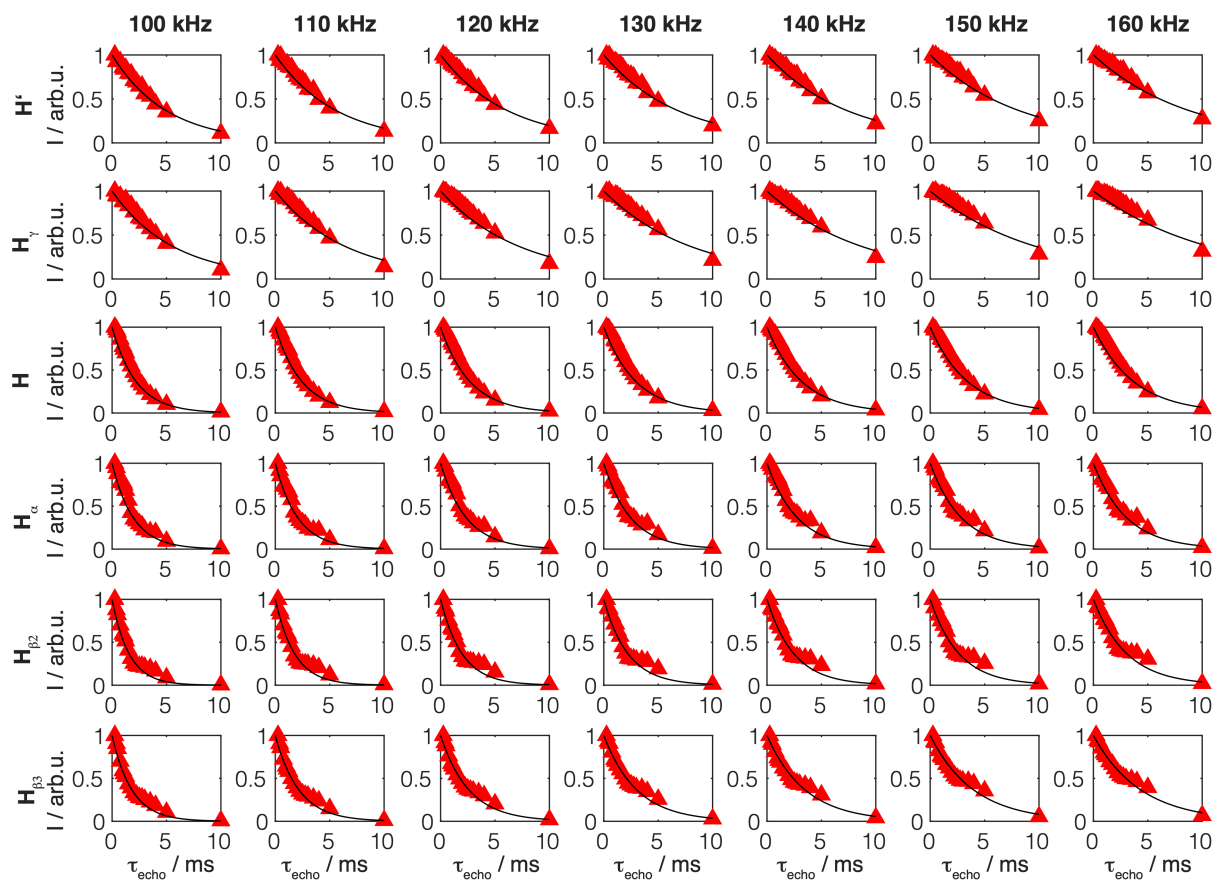

**FIGURE S4** Relaxation decay traces for  $T_2^*(^1H)$  determination of o-o L ser, using Hahn-Echo experiments recorded in an 0.5 mm rotor between 100 and 160 kHz MAS at 1200 MHz proton frequency. The corresponding mono-exponential fits are given as black lines.

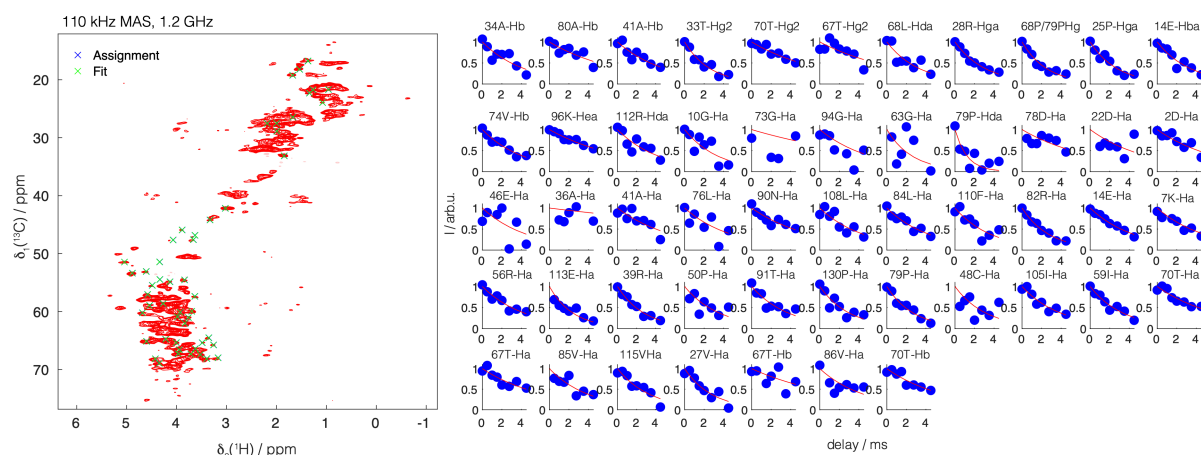

**FIGURE S5** Site specific homogeneous line width measurement for UL-Cp149 at 110 kHz MAS frequency and 1200 MHz proton frequency. Left: 2D-hCH spectrum recorded with 1  $\mu$ s spin echo time where the assigned peaks are shown with blue crosses and the corresponding fitted position with a green cross (overlapping, indicating a good fit). Right: corresponding extracted site specific  $T_2^*(^1H)$  relaxation traces with corresponding mono-exponential fits.

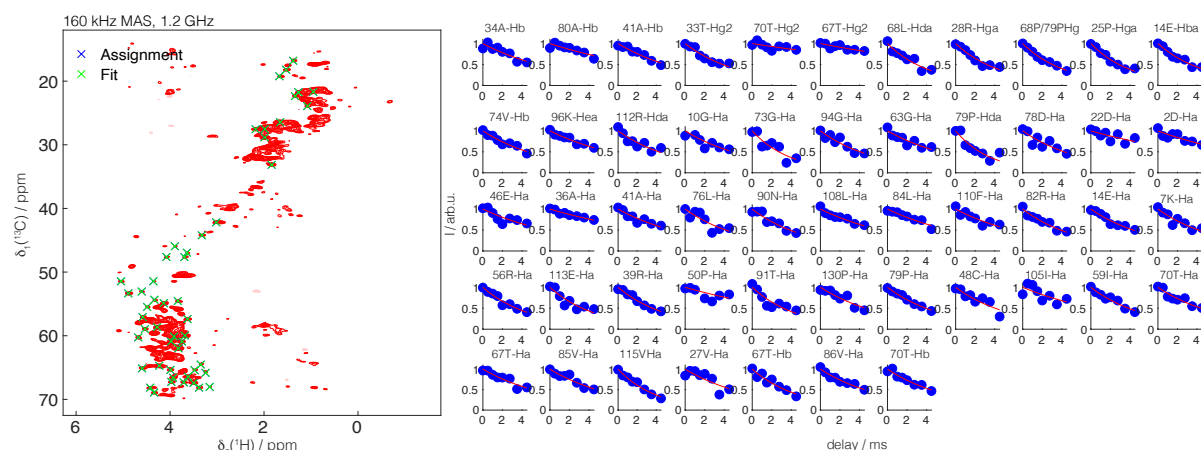

**FIGURE S6** Site specific homogeneous line width for UL-Cp149 at 160 kHz MAS frequency and 1200 MHz proton frequency. Left: 2D-hCH spectrum recorded with 1  $\mu$ s spin echo time where the assigned peaks are shown with blue crosses and the corresponding fitted position with a green cross (overlapping, indicating a good fit). Right: corresponding extracted site specific  $T_2^*(^1H)$  relaxation traces with corresponding mono-exponential fits.



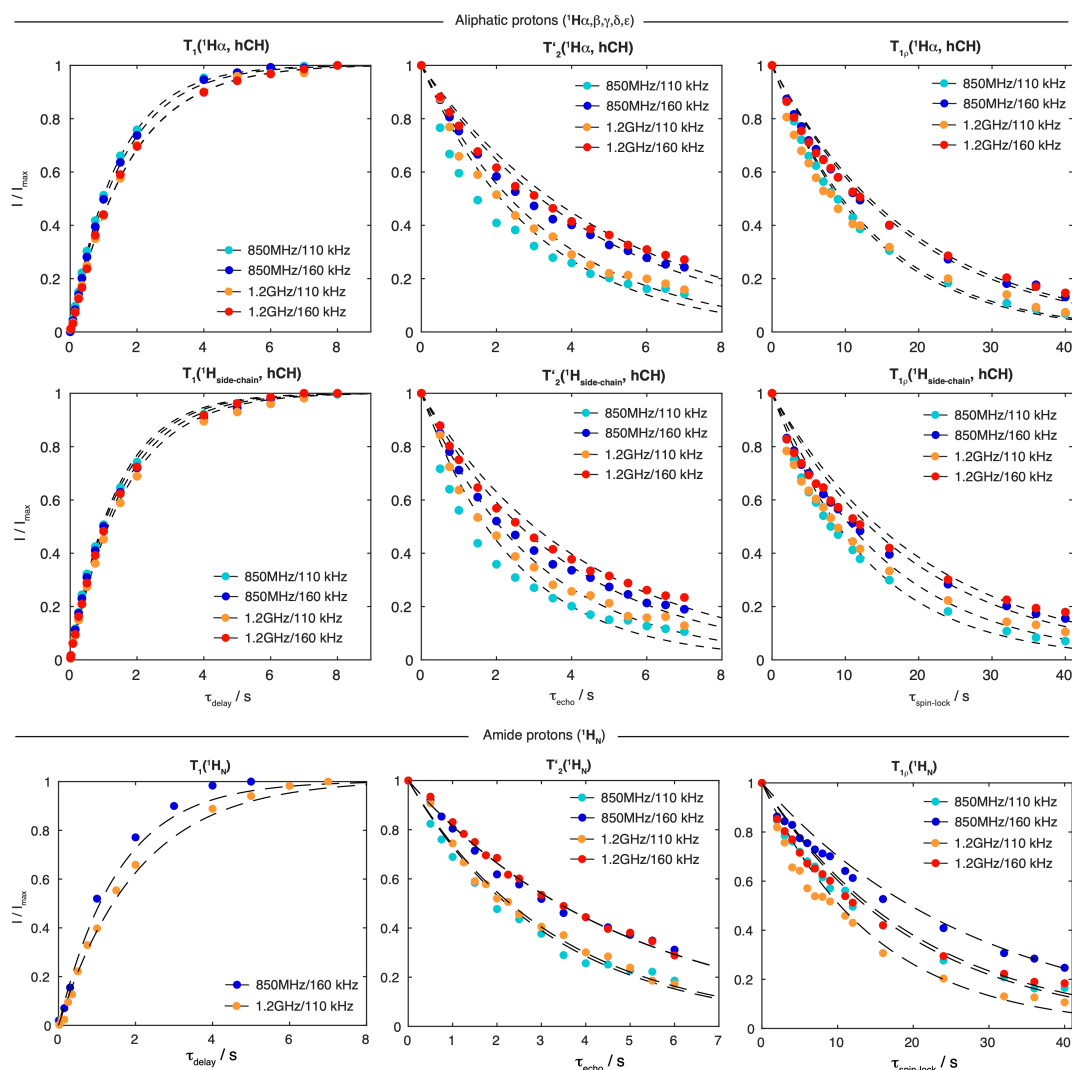

**FIGURE S7** Bulk relaxation decay traces for  $T_2'(^1\text{H})$ ,  $T_{1\rho}(^1\text{H})$  and  $T_1(^1\text{H})$  determination for UL-Cp149, in a 0.5 mm rotor between 100 and 160 kHz MAS at proton frequencies of 850 and 1200 MHz. The corresponding mono-exponential fits are given as black dashed lines.

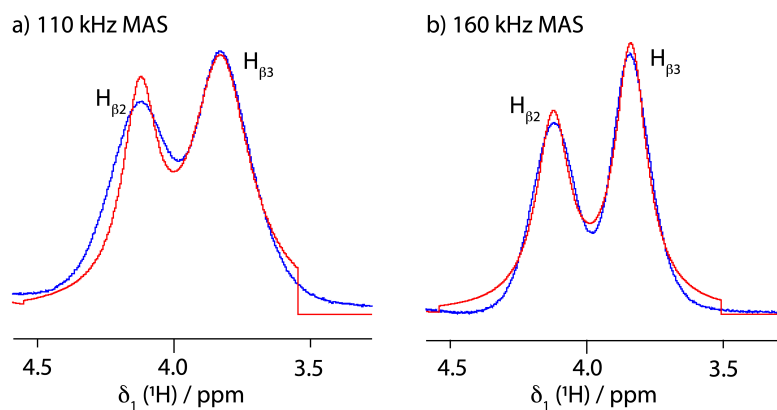

**FIGURE S8** 1D  $^1\text{H}$  spectra (blue) of *O*-phospho-L-serine recorded at a) 110 and b) 160 kHz MAS frequency and 850 MHz proton frequency. The fits of the line shapes Lorentz/Gauss lines are shown in red.

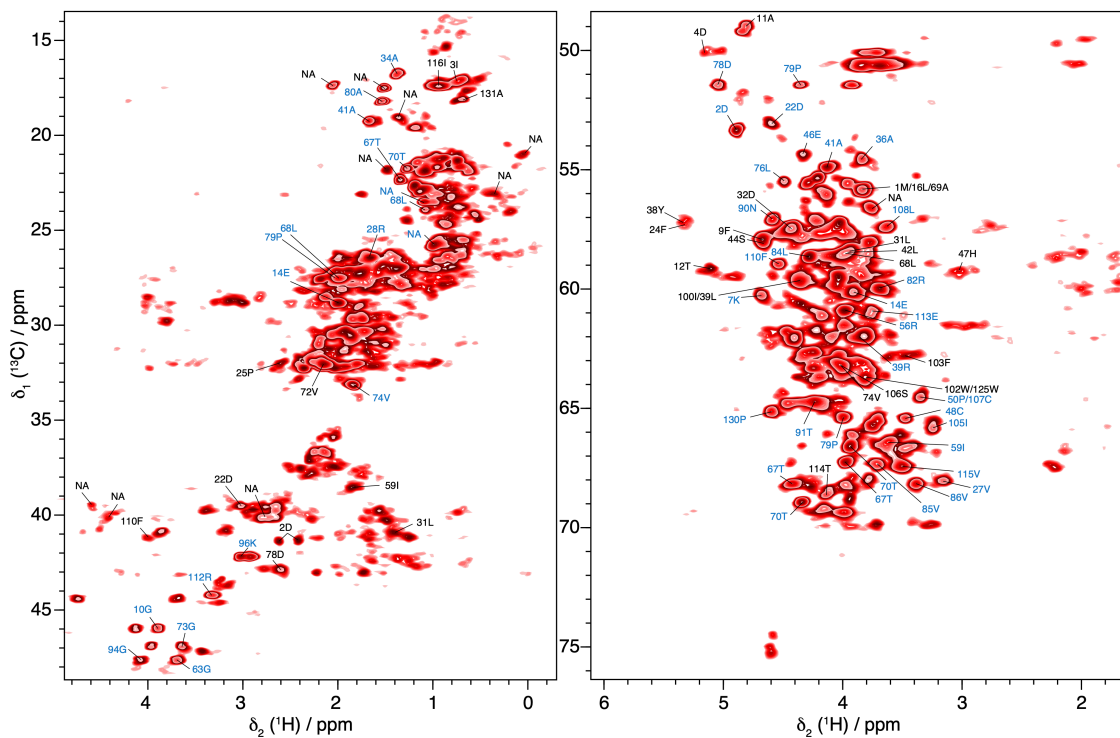

**FIGURE S9** 2D-hCH CP based spectrum of UL-Cp149 recorded at 160 kHz MAS frequency at 1200 MHz proton frequency. The peaks selected to measure the total (Fig. 2) proton line width are labeled. Among them, the homogeneous line width (Fig. 3) was measured on the 51 peaks labeled in blue. The peaks labeled NA are not assigned.

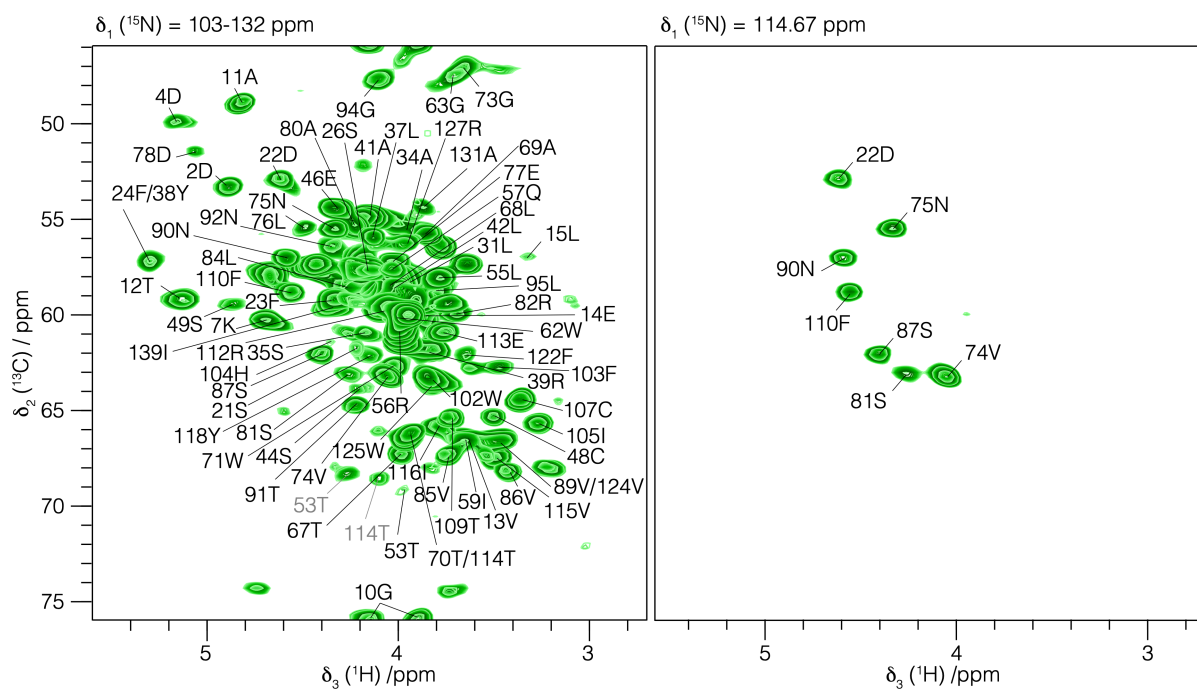

**FIGURE S10** 3D-hNCAHA spectrum of UL-Cp149 recorded at 160 kHz MAS frequency and 1200 MHz proton frequency. The amino-acid residues for which the  $H_{\alpha}$  resonance was assigned are labeled. The residues labeled in grey correspond to the correlation between  $^{15}\text{N}$ ,  $C_{\beta}$  and  $H_{\beta}$  of threonine residues. The right shows an extracted plan at  $\delta_1 (^{15}\text{N}) = 114.67$  ppm.

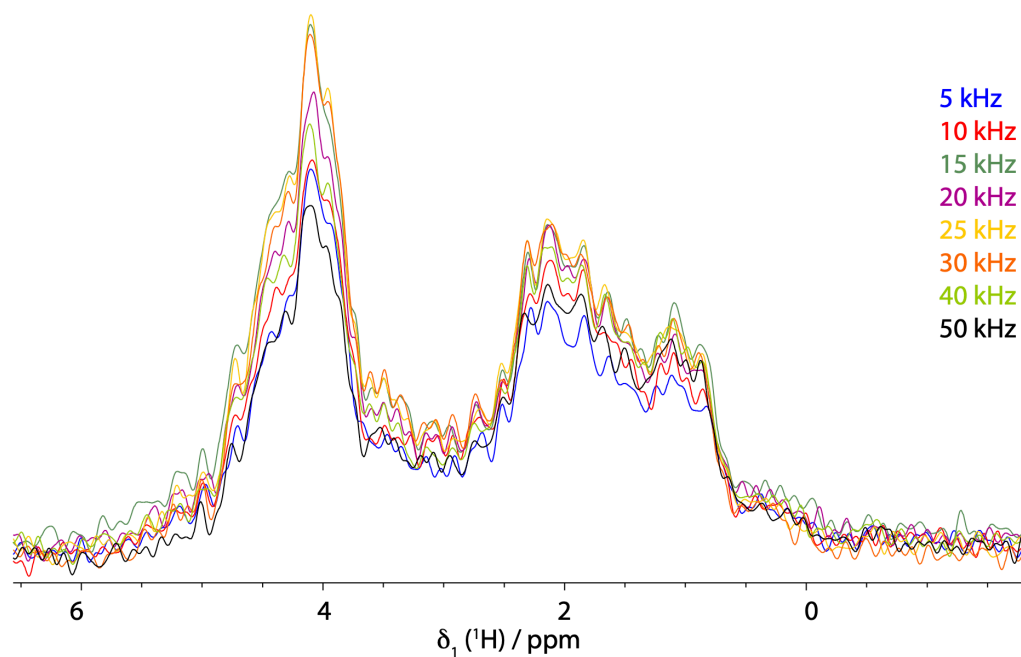

**FIGURE S11** WALTZ-16 irradiation optimization for TOBSY transfer in 3D-hCCH and HcCH experiments. 1D hcch TOBSY-WALTZ16 spectra of UL-Cp149 recorded at 160 kHz MAS frequency and at proton frequency of 1200 MHz at different WALTZ-16 irradiation frequency: 5, 10, 15, 20, 25, 30, 40 and 50 kHz.

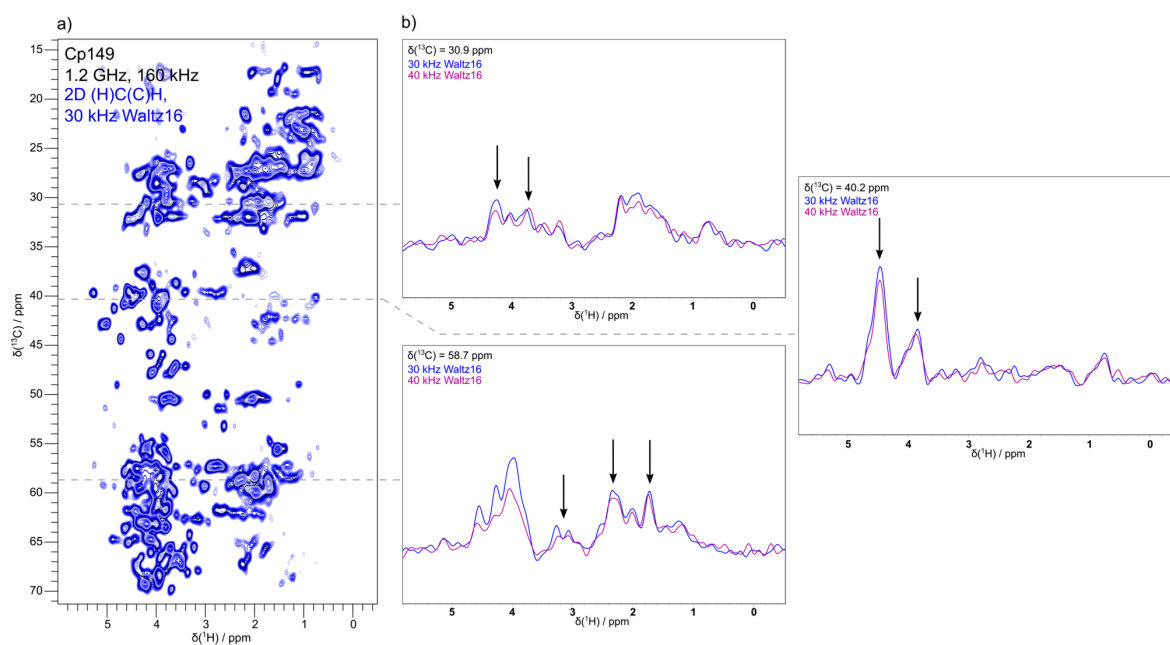

**FIGURE S12** WALTZ-16 irradiation optimization for TOBSY transfer in 3D-hCCH and 3D-HcCH experiments. **a)** 2D hCch TOBSY-WALTZ16 spectrum of UL-Cp149 recorded at 160 kHz MAS frequency and at proton frequency of 1200 MHz at a WALTZ-16 irradiation frequency of 30 kHz. **b)** 1D extracted traced of 2D-hCch TOBSY-WALTZ16 spectra of UL-Cp149 recorded at 160 kHz MAS frequency and at proton frequency of 1200 MHz at WALTZ-16 irradiation frequencies of 30 and 40 kHz. The peaks indicated by arrows corresponds to correlation between the first carbon and the last proton of the hCCH experiment.

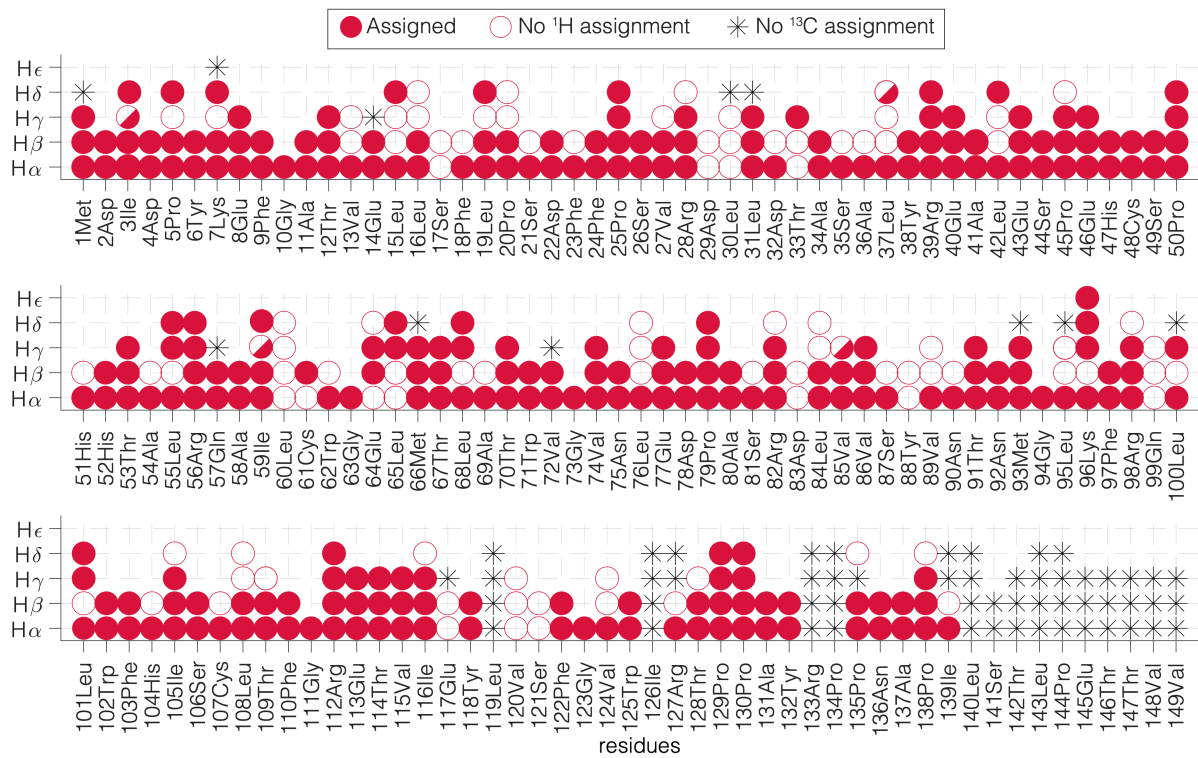

**FIGURE S13** Assignment of UL-Cp149 aliphatic protons using the 3D-hNCAHA and the 3D-hCCH and HcCH TOBSY experiments experiment. 61 % of the aliphatic protons could be assigned and are colored in red, among which 81 % of H $\alpha$  and 52 % of side chain protons (H $\beta$ , H $\gamma$ , H $\delta$  and H $\epsilon$ ). The residues for which the carbon assignment is missing are shown with asterisks.

## Supplementary Tables

**TABLE S1.** Experimental table for solid-state NMR acquisition and pulse program parameters used for the 2D-hCH CP-based experiments.

| <b>Experiment</b>                          | <b>2D hCH CP</b>       | <b>2D hCH CP</b>       | <b>2D hCH CP</b>       | <b>2D hCH CP</b>       |
|--------------------------------------------|------------------------|------------------------|------------------------|------------------------|
| <sup>1</sup> H Field / MHz                 | 850                    | 850                    | 1200                   | 1200                   |
| MAS frequency / kHz                        | 110                    | 160                    | 110                    | 160                    |
| Number of scans                            | 48                     | 48                     | 48                     | 48                     |
| Experimental time                          | 16h26                  | 16h26                  | 28h07                  | 28h08                  |
| t <sub>1</sub> increment                   | 640                    | 640                    | 904                    | 90448                  |
| Sweep width (t <sub>1</sub> ) / ppm        | 70                     | 70                     | 70                     | 70                     |
| Acquisition time (t <sub>1</sub> ) / ms    | 21.39                  | 21.39                  | 21.38                  | 21.38                  |
| t <sub>2</sub> increment                   | 2048                   | 2048                   | 4096                   | 4096                   |
| Sweep width (t <sub>2</sub> ) / ppm        | 46.68                  | 46.68                  | 36.96                  | 36.96                  |
| Acquisition time (t <sub>2</sub> ) / ms    | 25.80                  | 25.80                  | 36.86                  | 36.86                  |
| <sup>1</sup> H decoupling (swftppm) / kHz  | 10                     | 10                     | 10                     | 10                     |
| <sup>13</sup> C decoupling (WALTZ64) / kHz | 5                      | 5                      | 5                      | 5                      |
| MISSISSIPPI (120ms) / kHz                  | 20                     | 20                     | 20                     | 20                     |
| Inter-scan delay / s                       | 1.76                   | 1.86                   | 2.1                    | 2.1                    |
| <b>Transfer 1</b>                          | <b>HC dipolar</b>      | <b>HC dipolar</b>      | <b>HC dipolar</b>      | <b>HC dipolar</b>      |
| <sup>1</sup> H field / kHz                 | 132                    | 131                    | 89                     | 125                    |
| <sup>13</sup> C field / kHz                | 24                     | 24                     | 20                     | 31                     |
| Shape                                      | Tangent <sup>1</sup> H | Tangent <sup>1</sup> H | Tangent <sup>1</sup> H | Tangent <sup>1</sup> H |
| CP contact time / ms                       | 0.8                    | 0.8                    | 0.8                    | 0.8                    |
| <b>Transfer 2</b>                          | <b>CH dipolar</b>      | <b>CH dipolar</b>      | <b>CH dipolar</b>      | <b>CH dipolar</b>      |
| <sup>1</sup> H field / kHz                 | 120                    | 124                    | 89                     | 125                    |
| <sup>13</sup> C field / kHz                | 24                     | 24                     | 20                     | 31                     |
| Shape                                      | Tangent <sup>1</sup> H | Tangent <sup>1</sup> H | Tangent <sup>1</sup> H | Tangent <sup>1</sup> H |
| CP contact time / ms                       | 800                    | 800                    | 800                    | 800                    |
| Carrier <sup>13</sup> C / ppm              | 36.22                  | 36.22                  | 38.55                  | 35.55                  |
| Carrier <sup>1</sup> H / ppm               | 1.02                   | 1.02                   | 2.56                   | 0.43                   |

**TABLE S2.** Experimental table for solid-state NMR acquisition and pulse program parameters used for the 2D-hCH  $T_2'$  experiments on Cp14.

| <b>Experiment</b>                          | <b>2D hCH CP <math>T_2'</math></b>      | <b>2D hCH CP <math>T_2'</math></b>      |
|--------------------------------------------|-----------------------------------------|-----------------------------------------|
| $^1\text{H}$ Field / MHz                   | 1200                                    | 1200                                    |
| MAS frequency / kHz                        | 110                                     | 160                                     |
| Number of scans                            | 16                                      | 24                                      |
| Experimental time                          | 43h21                                   | 65h45                                   |
| $t_1$ increment                            | 540                                     | 540                                     |
| Spectral width ( $t_1$ ) / ppm             | 70                                      | 70                                      |
| Acquisition time ( $t_1$ ) / ms            | 12.77                                   | 12.77                                   |
| $t_2$ increment                            | 4096                                    | 4096                                    |
| Spectral width ( $t_2$ ) / ppm             | 46.25                                   | 46.25                                   |
| Acquisition time ( $t_2$ ) / ms            | 36.86                                   | 36.86                                   |
| $^1\text{H}$ decoupling (swftppm) / kHz    | 10                                      | 10                                      |
| $^{13}\text{C}$ decoupling (WALTZ64) / kHz | 5                                       | 5                                       |
| MISSISSIPPI (120ms) / kHz                  | 20                                      | 20                                      |
| Interscan delay / s                        | 2.1                                     | 2.1                                     |
| <b>Transfer 1</b>                          | <b>HC dipolar</b>                       | <b>HC dipolar</b>                       |
| $^1\text{H}$ field / kHz                   | 93                                      | 128                                     |
| $^{13}\text{C}$ field / kHz                | 21                                      | 31                                      |
| Shape                                      | Tangent $^1\text{H}$                    | Tangent $^1\text{H}$                    |
| CP contact time / ms                       | 0.8                                     | 0.8                                     |
| <b>Transfer 2</b>                          | <b>CH dipolar</b>                       | <b>CH dipolar</b>                       |
| $^1\text{H}$ field / kHz                   | 89                                      | 128                                     |
| $^{13}\text{C}$ field / kHz                | 21                                      | 31                                      |
| Shape                                      | Tangent $^1\text{H}$                    | Tangent $^1\text{H}$                    |
| CP contact time / ms                       | 0.8                                     | 0.8                                     |
| Mixing time / ms                           | (0.001, 0.5, 1, 1.5, 2, 2.75, 3.5, 4.5) | (0.001, 0.5, 1, 1.5, 2, 2.75, 3.5, 4.5) |
| Carrier $^{13}\text{C}$ / ppm              | 37.44                                   | 37.44                                   |
| Carrier $^1\text{H}$ / ppm                 | 0.449                                   | 0.427                                   |

**TABLE S3.** Experimental table for solid-state NMR acquisition and pulse program parameters used for the 3D-hNCAHA experiment on UL-Cp149.

| <b>Experiment</b>                          | <b>3D hNCAHA</b>        |
|--------------------------------------------|-------------------------|
| <sup>1</sup> H Field / MHz                 | 1200                    |
| MAS frequency / kHz                        | 160                     |
| Number of scans                            | 32                      |
| Experimental time                          | 30h24                   |
| t <sub>1</sub> increment                   | 42                      |
| Spectral width (t <sub>1</sub> ) / ppm     | 38                      |
| Acquisition time (t <sub>1</sub> ) / ms    | 4.54                    |
| t <sub>2</sub> increment                   | 72                      |
| Spectral width (t <sub>2</sub> ) / ppm     | 30                      |
| Acquisition time (t <sub>2</sub> ) / ms    | 3.93                    |
| t <sub>3</sub> increment                   | 4096                    |
| Spectral width (t <sub>3</sub> ) / ppm     | 46.25                   |
| Acquisition time (t <sub>3</sub> ) / ms    | 36.86                   |
| <sup>1</sup> H decoupling (swftppm) / kHz  | 10                      |
| <sup>13</sup> C decoupling (WALTZ64) / kHz | 5                       |
| <sup>15</sup> N decoupling (WALTZ64) / kHz | 5                       |
| MISSISSIPPI (120ms) / kHz                  | 20                      |
| Interscan delay / s                        | 2.1                     |
| <b>Transfer 1</b>                          | <b>HN dipolar</b>       |
| <sup>1</sup> H field / kHz                 | 127                     |
| <sup>15</sup> N field / kHz                | 28                      |
| Shape                                      | Tangent <sup>1</sup> H  |
| CP contact time / ms                       | 2                       |
| <b>Transfer 2</b>                          | <b>NC dipolar</b>       |
| <sup>13</sup> C field / kHz                | 60                      |
| <sup>15</sup> N field / kHz                | 97                      |
| Shape                                      | Tangent <sup>13</sup> C |
| CP contact time / ms                       | 20                      |
| <b>Transfer 3</b>                          | <b>CH dipolar</b>       |
| <sup>1</sup> H field / kHz                 | 127                     |
| <sup>13</sup> C field / kHz                | 28                      |
| Shape                                      | Tangent <sup>1</sup> H  |
| CP contact time / ms                       | 0.5                     |
| Carrier <sup>13</sup> C / ppm              | 55                      |
| Carrier <sup>13</sup> N / ppm              | 115                     |
| Carrier <sup>1</sup> H / ppm               | 1.59                    |

**TABLE S4.** Experimental table for solid-state NMR acquisition and pulse program parameters used for the 3D-hCCH and HcCH TOBSY experiments on UL-Cp149.

| <b>Experiment</b>                          | <b>3D hCCH<br/>TOBSY-WALTZ16</b> | <b>3D HcCH<br/>TOBSY-WALTZ16</b> | <b>3D hCCH<br/>TOBSY-C9</b> |
|--------------------------------------------|----------------------------------|----------------------------------|-----------------------------|
| <sup>1</sup> H Field / MHz                 | 1200                             | 1200                             | 1200                        |
| MAS frequency / kHz                        | 160                              | 160                              | 160                         |
| Number of scans                            | 8                                | 8                                | 16                          |
| Experimental time                          | 71h04                            | 71h48                            | 84h51                       |
| t <sub>1</sub> increment                   | 118                              | 110                              | 86                          |
| Spectral width (t <sub>1</sub> ) / ppm     | 58                               | 58                               | 60                          |
| Acquisition time (t <sub>1</sub> ) / ms    | 3.36                             | 3.65                             | 2.37                        |
| t <sub>2</sub> increment                   | 118                              | 128                              | 86                          |
| Spectral width (t <sub>2</sub> ) / ppm     | 58                               | 58                               | 60                          |
| Acquisition time (t <sub>2</sub> ) / ms    | 3.36                             | 3.65                             | 2.3                         |
| t <sub>3</sub> increment                   | 4096                             | 1400                             | 4096                        |
| Spectral width (t <sub>3</sub> ) / ppm     | 46.25                            | 46.25                            | 46.25                       |
| Acquisition time (t <sub>3</sub> ) / ms    | 36.86                            | 12.6                             | 36.8                        |
| <sup>1</sup> H decoupling (swftppm) / kHz  | 10                               | 10                               | 10                          |
| <sup>13</sup> C decoupling (WALTZ64) / kHz | 5                                | 5                                | 5                           |
| MISSISSIPPI (120ms) / kHz                  | 20                               | 20                               | 20                          |
| z-filter / ms                              | 10                               | 10                               | 10                          |
| Interscan delay / s                        | 2.1                              | 2.1                              | 2.1                         |
| <b>Transfer 1</b>                          | <b>HC dipolar</b>                | <b>HC dipolar</b>                | <b>HC dipolar</b>           |
| <sup>1</sup> H field / kHz                 | 131                              | 131                              | 118                         |
| <sup>13</sup> C field / kHz                | 30                               | 30                               | 41                          |
| Shape                                      | Tangent <sup>1</sup> H           | Tangent <sup>1</sup> H           | Tangent <sup>1</sup> H      |
| CP contact time / ms                       | 0.4                              | 0.4                              | 1.4                         |
| <b>Transfer 2</b>                          | <b>CC Jcoupling</b>              | <b>CC Jcoupling</b>              | <b>CC Jcoupling</b>         |
| Shape                                      | WALTZ16                          | WALTZ16                          | C9                          |
| <sup>13</sup> C field / kHz                | 30                               | 30                               | 45.18                       |
| Mixing time /ms                            | 11                               | 11                               | 15                          |
| <b>Transfer 3</b>                          | <b>CH dipolar</b>                | <b>CH dipolar</b>                | <b>CH dipolar</b>           |
| <sup>1</sup> H field / kHz                 | 129                              | 129                              | 117                         |
| <sup>13</sup> C field / kHz                | 30                               | 30                               | 41                          |
| Shape                                      | Tangent <sup>1</sup> H           | Tangent <sup>1</sup> H           | Tangent <sup>1</sup> H      |
| CP contact time / ms                       | 0.5                              | 0.5                              | 0.5                         |
| Carrier <sup>13</sup> C / ppm              | 36.55                            | 36.55                            | 33                          |
| Carrier <sup>1</sup> H / ppm               | 4.8                              | 4.8                              | 4.8                         |



**TABLE S5.** Total proton line width  $\Delta^{tot}$  for O-phospho-L-serine measured at increasing MAS frequencies from 100 to 160 kHz and proton frequency of a) 850 MHz and b) 1200 MHz. Experimental errors ( $\sigma$ ) are calculated as described in the Material and Methods section. The line width marked with a star are showing poor fits (see Fig. S7) due to the higher order terms in the AHT expansion.

a)  $\Delta^{tot}$  for O-phospho-L-serine measured at 850 MHz proton frequency

| MAS / kHz | $\Delta^{tot} (H') / \text{Hz}$ | $\Delta^{tot} (H_\gamma) / \text{Hz}$ | $\Delta^{tot} (H) / \text{Hz}$ | $\Delta^{tot} (H_\alpha) / \text{Hz}$ | $\Delta^{tot} (H_{\beta 2}) / \text{Hz}$ | $\Delta^{tot} (H_{\beta 3}) / \text{Hz}$ |
|-----------|---------------------------------|---------------------------------------|--------------------------------|---------------------------------------|------------------------------------------|------------------------------------------|
| 160       | $100.3 \pm 0.7$                 | $109.1 \pm 0.6$                       | $173.4 \pm 1.2$                | $128.8 \pm 0.7$                       | $126.2 \pm 1.8$                          | $120.2 \pm 1.3$                          |
| 150       | $105 \pm 2$                     | $113.7 \pm 0.8$                       | $179 \pm 2$                    | $135.2 \pm 1.0$                       | $132 \pm 3$                              | $129 \pm 2$                              |
| 140       | $108 \pm 2$                     | $117.6 \pm 0.9$                       | $185 \pm 2$                    | $145 \pm 2$                           | $143 \pm 3$                              | $139 \pm 3$                              |
| 130       | $111 \pm 2$                     | $121.4 \pm 0.9$                       | $191 \pm 2$                    | $130 \pm 2$                           | $152 \pm 3$                              | $159 \pm 3$                              |
| 120       | $115 \pm 2$                     | $127.3 \pm 0.9$                       | $199 \pm 2$                    | $173 \pm 2$                           | $168 \pm 3$                              | $167 \pm 3$                              |
| 110       | $132.3 \pm 0.1$                 | $145.1 \pm 1.0$                       | $216 \pm 2$                    | $280 \pm 5$                           | *                                        | $218 \pm 6$                              |
| 100       | $126 \pm 2$                     | $141.2 \pm 1.0$                       | $220 \pm 2$                    | *                                     | $204 \pm 14$                             | $224 \pm 6$                              |

b)  $\Delta^{tot}$  for O-phospho-L-serine measured at 1200 MHz proton frequency

| MAS / kHz | $\Delta^{tot} (H') / \text{Hz}$ | $\Delta^{tot} (H_\gamma) / \text{Hz}$ | $\Delta^{tot} (H) / \text{Hz}$ | $\Delta^{tot} (H_\alpha) / \text{Hz}$ | $\Delta^{tot} (H_{\beta 2}) / \text{Hz}$ | $\Delta^{tot} (H_{\beta 3}) / \text{Hz}$ |
|-----------|---------------------------------|---------------------------------------|--------------------------------|---------------------------------------|------------------------------------------|------------------------------------------|
| 160       | $130 \pm 5$                     | $144 \pm 5$                           | $183 \pm 5$                    | $122 \pm 7$                           | $128 \pm 12$                             | $118 \pm 7$                              |
| 150       | $129 \pm 5$                     | $143 \pm 5$                           | $187 \pm 5$                    | $126 \pm 7$                           | $133 \pm 11$                             | $123 \pm 7$                              |
| 140       | $129 \pm 5$                     | $144 \pm 5$                           | $192 \pm 5$                    | $131 \pm 7$                           | $142 \pm 12$                             | $130 \pm 7$                              |
| 130       | $135 \pm 2$                     | $148 \pm 4$                           | $198 \pm 5$                    | $139 \pm 8$                           | $152 \pm 12$                             | $142 \pm 7$                              |
| 120       | $134 \pm 5$                     | $153 \pm 4$                           | $206 \pm 5$                    | $148 \pm 8$                           | $164 \pm 12$                             | $154 \pm 8$                              |
| 110       | $138 \pm 5$                     | $159 \pm 4$                           | $216 \pm 5$                    | $160 \pm 8$                           | $180 \pm 12$                             | $169 \pm 8$                              |
| 100       | $143 \pm 5$                     | $166 \pm 4$                           | $227 \pm 5$                    | $175 \pm 8$                           | $199 \pm 11$                             | $189 \pm 8$                              |

**TABLE S6** Bulk relaxation times of a) aliphatic protons and b) amide protons and  $^{15}\text{N}$  of UL-Cp149. For the aliphatic protons, region A is defined between  $\delta(^1\text{H}) = 2.75 - 5.9$  ppm and corresponds to the  $\text{H}_\alpha$  and region B is defined between  $\delta(^1\text{H}) = 0 - 2.75$  ppm and corresponds to the side-chain protons ( $\text{CH}_2$  and  $\text{CH}_3$ ).

a) Bulk relaxation times of aliphatic protons

| Region A<br>(field / MHz, MAS / kHz) | $T_1(H_\alpha)$ / s | $T'_2(H_\alpha)$ / ms | $T_{1\rho}(H_\alpha)$ / ms |
|--------------------------------------|---------------------|-----------------------|----------------------------|
| 850, 110                             | $1.41 \pm 0.01$     | $3.0 \pm 0.2$         | $13.3 \pm 0.3$             |
| 1200, 110                            | $1.75 \pm 0.02$     | $3.4 \pm 0.1$         | $13.8 \pm 0.6$             |
| 850, 160                             | $1.51 \pm 0.02$     | $4.6 \pm 0.1$         | $18.5 \pm 0.4$             |
| 1200, 160                            | $1.74 \pm 0.03$     | $5.0 \pm 0.1$         | $19.2 \pm 0.6$             |
| Region B<br>(field / MHz, MAS / kHz) | $T_1(H^{sc})$ / s   | $T'_2(H^{sc})$ / ms   | $T_{1\rho}(H^{sc})$ / ms   |
| 850, 110                             | $1.37 \pm 0.03$     | $2.5 \pm 0.1$         | $13.1 \pm 0.4$             |
| 1200, 110                            | $1.64 \pm 0.03$     | $3.0 \pm 0.1$         | $15.6 \pm 0.8$             |
| 850, 160                             | $1.43 \pm 0.03$     | $3.8 \pm 0.1$         | $19.2 \pm 0.7$             |
| 1200, 160                            | $1.53 \pm 0.02$     | $4.3 \pm 0.1$         | $21.0 \pm 1.0$             |

b) Bulk relaxation times of amide protons

| (field / MHz, MAS / kHz) | $T_1(H_N)$ / s  | $T'_2(H_N)$ / ms | $T_{1\rho}(H_N)$ / ms | $T'_2(^{15}\text{N})$ / ms |
|--------------------------|-----------------|------------------|-----------------------|----------------------------|
| 850, 110                 | -               | $3.2 \pm 0.1$    | $19.8 \pm 0.7$        | $46.3 \pm 1.9$             |
| 1200, 110                | $2.06 \pm 0.08$ | $3.3 \pm 0.8$    | $14.9 \pm 0.8$        | $37 \pm 2$                 |
| 850, 160                 | $1.55 \pm 0.09$ | $4.9 \pm 0.1$    | $28.4 \pm 0.7$        | $56.1 \pm 2.9$             |
| 1200, 160                | -               | $4.9 \pm 0.8$    | $20.7 \pm 0.7$        | $36.5 \pm 0.5$             |

**TABLE S7** Site-specific  $T_2'(^1H^{ali})$  times and  $\Delta^{homo}(^1H^{ali}) = 1/(T_2'(^1H^{ali}) \cdot \pi)$  for the 51 residues (labeled in blue in Fig. S8) of UL-Cp149 at 160 kHz and 110 kHz MAS frequency and a proton frequency of 1200 MHz, obtained from the mono-exponential fits in Fig. S4 and 5. The experimental standard deviations ( $\sigma$ ) are calculated as described in the Material and Methods section. The  $T_2'$  standard deviations ( $\sigma$ ) marked with a star are higher than the  $T_2'$  value, indicating a poor fit due to low SNR data for the corresponding residues as shown in Fig. S4 and S5.

| Residue             | 110 kHz MAS |                     |                      |                              | 160 kHz MAS |                     |                      |                              |
|---------------------|-------------|---------------------|----------------------|------------------------------|-------------|---------------------|----------------------|------------------------------|
|                     | $T_2' / ms$ | $\sigma(T_2') / ms$ | $\Delta^{homo} / Hz$ | $\sigma(\Delta^{homo}) / Hz$ | $T_2' / ms$ | $\sigma(T_2') / ms$ | $\Delta^{homo} / Hz$ | $\sigma(\Delta^{homo}) / Hz$ |
| 34AlaHb             | 4,2         | 1,2                 | 75,1                 | 39,1                         | 8,1         | 1,7                 | 39,1                 | 7,4                          |
| 80AlaHb             | 7,2         | 2,1                 | 43,9                 | 24,0                         | 13,2        | 3,7                 | 24,0                 | 5,4                          |
| 41AlaHb             | 4,9         | 1,0                 | 64,4                 | 43,9                         | 7,3         | 0,7                 | 43,9                 | 4,3                          |
| 33ThrHg2            | 2,6         | 0,3                 | 123,4                | 57,4                         | 5,5         | 0,6                 | 57,4                 | 6,3                          |
| 70ThrHg2            | 7,2         | 1,1                 | 43,9                 | 11,4                         | 27,8        | *                   | 11,4                 | 4,9                          |
| 67ThrHg2            | 8,3         | *                   | 38,5                 | 14,4                         | 22,1        | 6,0                 | 14,4                 | 2,9                          |
| 68LeuHda            | 3,3         | 0,9                 | 96,2                 | 74,1                         | 4,3         | 0,5                 | 74,1                 | 9,4                          |
| 28ArgHba            | 3,1         | 0,2                 | 103,3                | 69,4                         | 4,6         | 0,4                 | 69,4                 | 6,6                          |
| 68LeuHg<br>79ProHba | 2,5         | 0,2                 | 127,5                | 72,7                         | 4,4         | 0,2                 | 72,7                 | 2,8                          |
| 25ProHga            | 2,7         | 0,3                 | 116,4                | 76,8                         | 4,1         | 0,3                 | 76,8                 | 5,6                          |
| 14GluHba            | 3,4         | 0,5                 | 94,4                 | 65,5                         | 4,9         | 0,3                 | 65,5                 | 4,6                          |
| 74ValHb             | 4,1         | 0,4                 | 76,8                 | 48,4                         | 6,6         | 0,6                 | 48,4                 | 4,8                          |
| 96LysHea            | 7,7         | 0,7                 | 41,6                 | 36,6                         | 8,7         | 0,7                 | 36,6                 | 3,2                          |
| 112ArgHda           | 4,3         | 1,5                 | 74,1                 | 51,7                         | 6,2         | *                   | 51,7                 | 9,5                          |
| 10GlyHaa            | 3,4         | 1,5                 | 93,6                 | 45,7                         | 7,0         | 2,3                 | 45,7                 | 11,8                         |
| 73GlyHaa            | 14,4        | *                   | 22,1                 | 81,3                         | 3,9         | 0,9                 | 81,3                 | 15,6                         |
| 63GlyHaa            | 5,2         | *                   | 61,1                 | 54,6                         | 5,8         | 0,9                 | 54,6                 | 8,5                          |
| 94GlyHaa            | 2,6         | *                   | 122,4                | 41,8                         | 7,6         | 1,3                 | 41,8                 | 7,2                          |
| 79ProHda            | 1,2         | 0,3                 | 256,7                | 89,4                         | 3,6         | 0,7                 | 89,4                 | 16,4                         |
| 78AspHa             | 7,3         | 10,5                | 43,4                 | 52,1                         | 6,1         | 1,5                 | 52,1                 | 11,3                         |
| 22AspHa             | 5,8         | *                   | 54,4                 | 20,7                         | 15,3        | 24,6                | 20,7                 | 7,0                          |
| 2AspHa              | 6,0         | 1,4                 | 52,8                 | 27,4                         | 11,6        | 2,7                 | 27,4                 | 5,6                          |
| 46GluHa             | 4,6         | *                   | 68,9                 | 34,6                         | 9,2         | 2,6                 | 34,6                 | 8,1                          |
| 36AlaHa             | 35,1        | *                   | 9,1                  | 21,7                         | 14,6        | 1,3                 | 21,7                 | 2,0                          |
| 41AlaHa             | 5,8         | 2,3                 | 54,9                 | 39,8                         | 8,0         | 1,2                 | 39,8                 | 5,4                          |
| 76LeuHa             | 4,9         | *                   | 65,4                 | 53,4                         | 6,0         | 1,9                 | 53,4                 | 12,5                         |
| 90AsnHa             | 6,1         | 1,2                 | 51,8                 | 57,5                         | 5,5         | 0,7                 | 57,5                 | 7,4                          |
| 108LeuHa            | 4,5         | 1,2                 | 70,2                 | 36,4                         | 8,7         | 1,0                 | 36,4                 | 3,9                          |
| 84LeuHa             | 4,4         | 0,6                 | 72,4                 | 35,4                         | 9,0         | 1,3                 | 35,4                 | 4,4                          |
| 110PheHa            | 3,7         | 1,1                 | 85,7                 | 38,9                         | 8,2         | 1,6                 | 38,9                 | 6,5                          |
| 82ArgHa             | 2,8         | 0,2                 | 114,8                | 57,1                         | 5,6         | 0,5                 | 57,1                 | 5,1                          |
| 14GluHa             | 4,5         | 0,3                 | 70,4                 | 51,2                         | 6,2         | 0,6                 | 51,2                 | 4,5                          |
| 7LysHa              | 4,9         | 1,7                 | 64,8                 | 53,1                         | 6,0         | 1,1                 | 53,1                 | 8,7                          |
| 56ArgHa             | 4,3         | 0,5                 | 74,1                 | 64,6                         | 4,9         | 0,4                 | 64,6                 | 5,3                          |
| 113GluHa            | 2,4         | 0,4                 | 132,3                | 66,8                         | 4,8         | 0,8                 | 66,8                 | 10,8                         |
| 39ArgHa             | 2,8         | 0,2                 | 115,3                | 61,1                         | 5,2         | *                   | 61,1                 | 4,0                          |
| 50ProHa             | 3,6         | 1,4                 | 89,4                 | 21,3                         | 14,9        | *                   | 21,3                 | 10,4                         |
| 91ThrHa             | 3,8         | 0,8                 | 84,5                 | 69,1                         | 4,6         | 1,0                 | 69,1                 | 12,2                         |
| 130ProHa            | 3,0         | 0,7                 | 105,7                | 47,5                         | 6,7         | 1,2                 | 47,5                 | 7,9                          |
| 79ProHa             | 2,7         | 0,3                 | 117,9                | 56,1                         | 5,7         | 0,3                 | 56,1                 | 2,7                          |
| 48CysHa             | 3,2         | *                   | 100,7                | 54,6                         | 5,8         | 1,2                 | 54,6                 | 10,1                         |
| 105IleHa            | 4,0         | 0,6                 | 80,5                 | 30,5                         | 10,4        | 21,7                | 30,5                 | 11,1                         |
| 59IleHa             | 3,4         | 0,4                 | 94,8                 | 57,3                         | 5,6         | 0,5                 | 57,3                 | 5,3                          |

|          |     |     |       |      |     |     |      |      |
|----------|-----|-----|-------|------|-----|-----|------|------|
| 70ThrHa  | 6,1 | 1,0 | 52,5  | 50,1 | 6,4 | 0,8 | 50,1 | 7,0  |
| 67ThrHa  | 6,4 | 1,5 | 49,5  | 43,5 | 7,3 | 1,0 | 43,5 | 5,9  |
| 85ValHa  | 4,0 | 1,1 | 78,7  | 46,2 | 6,9 | 0,9 | 46,2 | 6,3  |
| 115ValHa | 3,4 | 0,7 | 93,5  | 79,7 | 4,0 | 0,3 | 79,7 | 5,1  |
| 27ValHa  | 2,8 | 0,5 | 113,6 | 45,7 | 7,0 | 3,4 | 45,7 | 13,1 |
| 86ValHa  | 9,3 | *   | 34,1  | 66,4 | 4,8 | 0,7 | 66,4 | 8,1  |
| 67ThrHb  | 4,6 | 2,9 | 69,5  | 49,0 | 6,5 | 0,6 | 49,0 | 4,3  |
| 70ThrHb  | 6,0 | 1,0 | 53,4  | 50,3 | 6,3 | 0,7 | 50,3 | 5,0  |
